# Supplementary material for: Correlations between behavior and hormone concentrations or gut microbiome imply that domestic cats (Felis silvestris catus) living in a group are not like ‘groupmates’
Source: PLoS One. 2022 Jul 27;17(7):e0269589. doi: 10.1371/journal.pone.0269589 (PMC9328509; doi:10.1371/journal.pone.0269589)
Supplement: S2 Table — (CSV) [file pone.0269589.s005.csv]

Behaviors	Events	Definitions
Attack	Point event	Swipes with paws and bites other individuals. Includes chasing other individuals into a corner. If there is a pause of more than 2 seconds, the recording of attack was stopped.
Escape	Point event	Running away from the attackers. Curling the body into a small, getting down.
Grooming	State event	Licking the coat of other individuals. When they groom their own body or there is a pause of more than 2 seconds, the recording of grooming is stopped.
Rubbing	Point event	Rubbing the body on another individual while walking.
Following	Point event	Following other individuals.
Playing	Point event	Belly up, stand up, side step, bounce and erect. In addition, chasing each other including these behaviors. It did not include playing with objects, only playing with other cats.
Entering bed	Point event	Entering a bed where the other individual is staying.
Sharing food	State event	Eating food together from the same plate when another individual is eating. If there is a pause of more than 2 seconds, the recording of sharing food was stopped.
Sharing bed	State event	All the limbs are in the bed where the other individual is staying.
Sniffing	Point event	Using the nose to get the odor of the body of another individual.
